# Supplementary material
Source: PubMed Central journal article supplement (PMC6281169)
Supplement: NIHMS951876-supplement-12035_2018_989_MOESM1_ESM.pdf [file NIHMS951876-supplement-12035_2018_989_MOESM1_ESM.pdf]

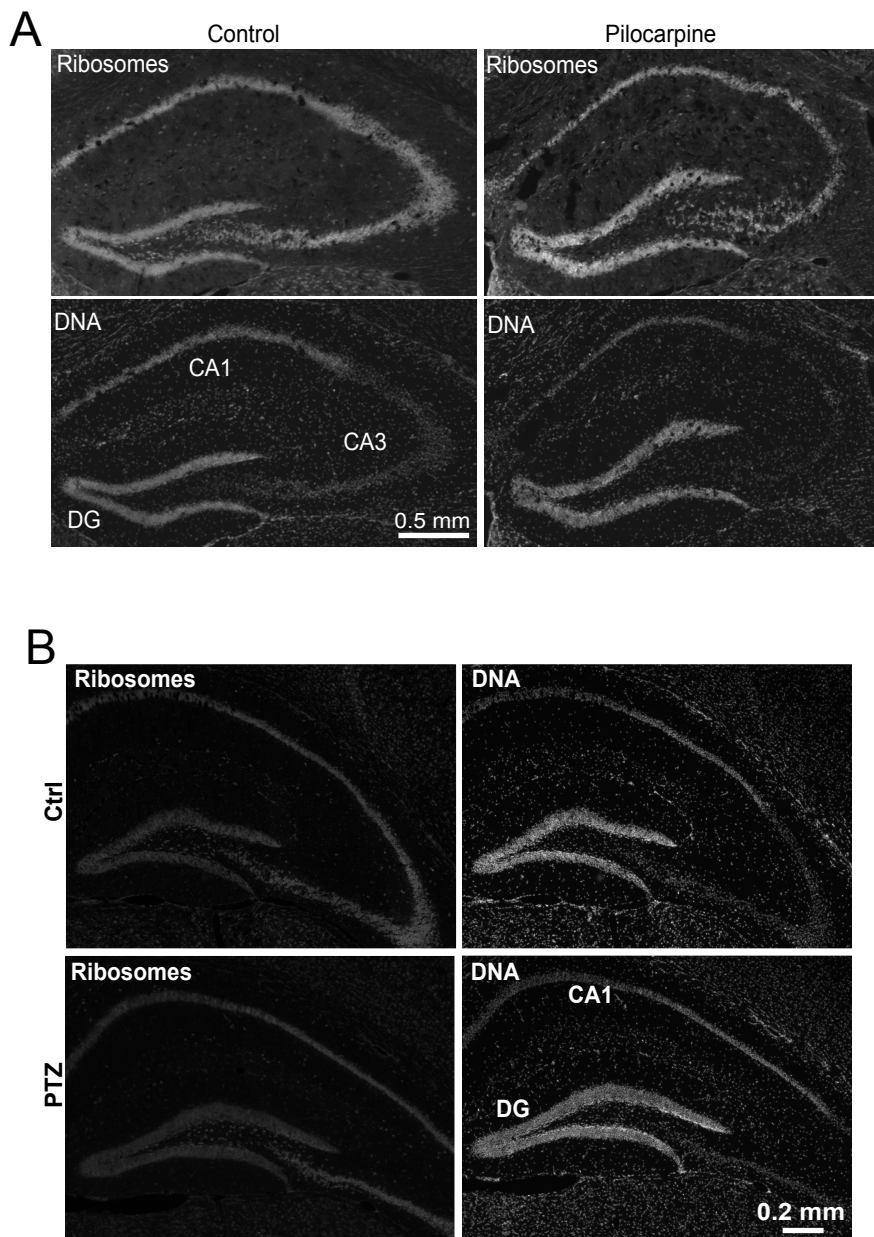

**Figure S1. A,** Mice (C57Bl6 males) were treated with vehicle (control, ctrl) or pilocarpine (300 mg/kg) to induce SE. Representative images of ribosome (NeuroTrace<sup>®</sup> 500/525 Green Fluorescent Nissl)- or DNA (Hoechst 33258) in the dorsal hippocampus of control or Pilo-SE mice (6 weeks post SE). Note apparent reductions in Nissl-staining in the CA and the DG hilar regions of Pilo-SE animals confirming pilocarpine-induced hippocampal neurodegeneration. **B,** Mice (C57Bl6 males) were treated with 10 sub-seizures doses of PTZ (35 mg/kg) or vehicle (control, ctrl) every other day; fully kindled animals that displayed tonic-clonic seizures (at least stage 4) after each of the last 5 injections of PTZ were used for evaluation of ribosome content. Representative images of ribosomal staining (NeuroTrace<sup>®</sup> 500/525 Green Fluorescent Nissl) in the dorsal hippocampus of PTZ-kindled mice are shown; DNA was counterstained with Hoechst 33258. Quantitative analysis of fluorescence intensity revealed no significant changes in DNA-normalized content of ribosomes in the granule cell layer of the DG or stratum pyramidale of the CA1 region of PTZ kindled mice (Fig. 4E-F).

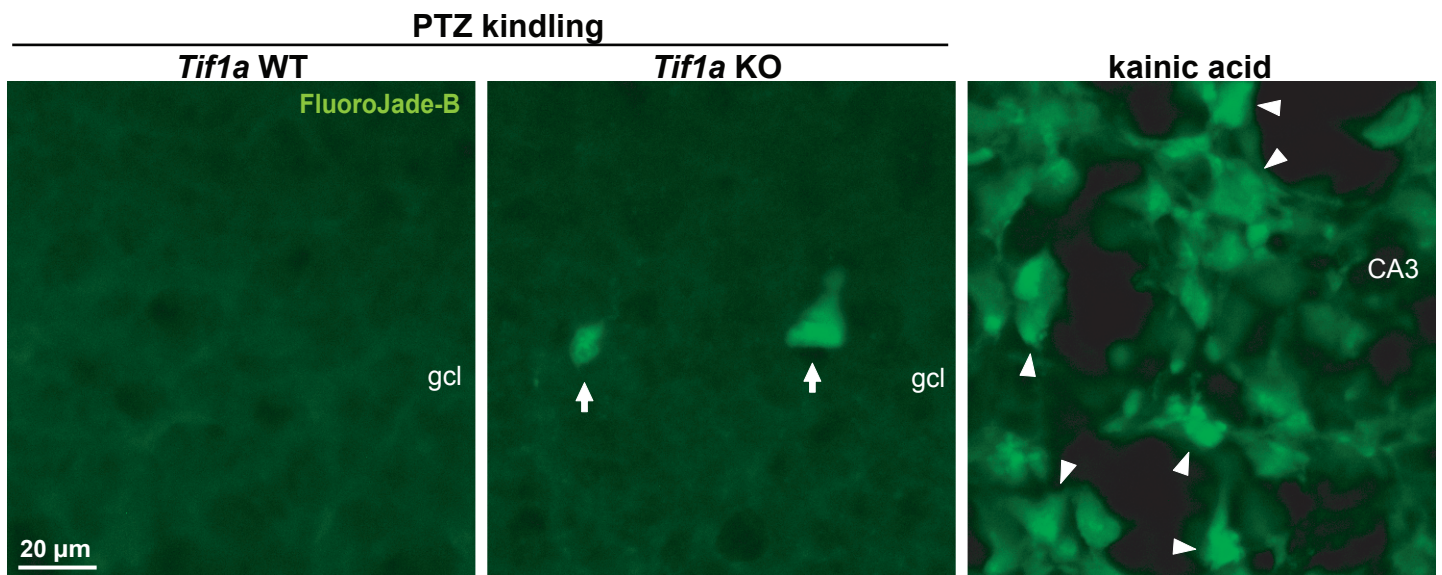

**Figure S2.** FluoroJade-B staining reveals few degenerating neurons in the DG granule cell layer (gcl) of PTZ-kindled *Tif1a* KO mice. Representative images of sections from the study that is described in Fig. 5 are shown. Positive cells are pointed by arrows. Counts of positive cells/section from the DG, CA1, and, CA3 regions are presented in Table 3. Sections from mice that survived 4 days after unilateral intra-amygdalar injection of kainic acid were used as a positive control. As reported in the literature (Brain Research 1213: 140-151. doi:10.1016/j.brainres.2008.03.061), such treatment resulted in appearance of many degenerating (*i.e.* FluoroJade-B-positive) cells in the CA3 region of the ipsilateral hippocampus (arrowheads).

**Supplementary Table S1. Upregulated ribosomal protein mRNAs in the hippocampus of pilocarpine-SE-challenged mice (analysis of the publically available RNASeq dataset GSE72402)<sup>a, b</sup>.**

| Time post Pilo-SE | Gene Symbol | Gene Name                    | Fold Change | Q-value  |
|-------------------|-------------|------------------------------|-------------|----------|
| 12h               | Rpl8        | ribosomal protein L8         | 3.1         | 9.63E-15 |
|                   | Rpl18       | ribosomal protein L18        | 17.6        | 1.43E-09 |
|                   | Rplp1       | ribosomal protein, large, P1 | 2.9         | 1.98E-05 |
|                   | Rps2        | ribosomal protein S2         | 2.8         | 0.00021  |
| 10 days           | Rpl26       | ribosomal protein L26        | 35.6        | 8.66E-16 |
|                   | Rpl8        | ribosomal protein L8         | 4.9         | 8.66E-16 |
|                   | Rpl18       | ribosomal protein L18        | 27.1        | 1.39E-15 |
|                   | Rps3        | ribosomal protein S3         | 2.9         | 1.60E-15 |
|                   | Rpl6        | ribosomal protein L6         | 15.1        | 2.68E-10 |
|                   | Rpl29       | ribosomal protein L29        | 89.2        | 1.74E-09 |
|                   | Rps2        | ribosomal protein S2         | 3.1         | 2.16E-05 |
|                   | Rps27l      | ribosomal protein S27-like   | 11          | 6.01E-05 |
|                   | Rpl32       | ribosomal protein L32        | 4.7         | 0.00087  |
|                   | Rplp2       | ribosomal protein, large P2  | 27.6        | 0.00149  |
|                   | Rplp1       | ribosomal protein, large, P1 | 3.3         | 0.00252  |
|                   | Rpl39       | ribosomal protein L39        | 10.3        | 0.00335  |
| 6 weeks           | Rpl8        | ribosomal protein L8         | 2.2         | 4.76E-05 |

<sup>a</sup>Downregulation of many RP transcripts was also observed (Rps15a at 12 h- or 10 day time point; Rpl34, Rps4x, Rps15, Rpl13a, Rps15a, Rpl4, Rpl8 at 6 week time point). However, as such events may have been caused by post SE neurodegeneration, their interpretation is unclear without follow up expression studies at a single cell level.

<sup>b</sup>Hansen, K. F., Sakamoto, K., Pelz, C., Impey, S. and Obrietan, K. (2014) Profiling status epilepticus-induced changes in hippocampal RNA expression using high-throughput RNA sequencing. *Scientific reports*, 4, 6930.
